# Supplementary material for: Upregulated TRIM29 promotes proliferation and metastasis of nasopharyngeal carcinoma via PTEN/AKT/mTOR signal pathway
Source: PubMed Central journal article supplement (PMC4924667; doi:10.18632/oncotarget.7215), 2016-02-08
Supplement: oncotarget-07-13634-s001.pdf [file oncotarget-07-13634-s001.pdf]

## Upregulated TRIM29 promotes proliferation and metastasis of nasopharyngeal carcinoma via PTEN/AKT/mTOR signal pathway

### SUPPLEMENTARY MATERIAL

**Supplementary table 1. TRIM29 was up-regulated in C666-1 and CNE2 cells compared with NP69 cells in RNA-Seq data.**

| Gene   | Mean expression |        |       | log (fold change)      | P-value  | Q-value  |
|--------|-----------------|--------|-------|------------------------|----------|----------|
|        | NP69            | C666-1 | CNE2  |                        |          |          |
| TRIM29 | 0.04            | 27.97  | 57.58 | 9.40 (C666-1 vs. NP69) | 1.34E-08 | 5.82E-06 |
|        |                 |        |       | 10.44 (CNE2 vs. NP69)  |          |          |

**Supplementary table 2. MiR-335-5p and miR-15b-5p were down-regulated in C666-1 and CNE2 cells compared with NP69 cells in microRNA-Seq results.**

| MicroRNA       | Mean expression value |        |      | log (fold change)      | P-value  |
|----------------|-----------------------|--------|------|------------------------|----------|
|                | NP69                  | C666-1 | CNE2 |                        |          |
| hsa-miR-15b-5p | 427.92                | 1.14   | 2.64 | 8.56 (NP69 vs. C666-1) | 1.39E-08 |
|                |                       |        |      | 7.34 (NP69 vs. CNE2)   |          |
| hsa-miR-335-5p | 34.54                 | 2.01   | 0.00 | 4.10 (NP69 vs. C666-1) | 0.03     |
|                |                       |        |      | 18.40 (NP69 vs. CNE2)  |          |
